# Supplementary material for: A Novel Parallel Ant Colony Optimization Algorithm for Warehouse Path Planning
Source: Hindawi journal article supplement (doi:10.1155/2020/5287189), 2020-08-01
Supplement: f1 [file 5287189.f1.docx]

**1.Programming procedure: p-raco TSP test（Part of it）**

N=size(Cities_XY,1); Dist=zeros(N,N); for i=1:N for j=i+1:N

Dist(i,j)=sqrt(sum( (Cities_XY(i,:)-Cities_XY(j,:)).^2 )); end end

Dist=Dist+Dist';

Dist(Dist==0)=0.0001;

A=3;

M=35; W=20; n=10; alpha=6; beta=7; rho=0.10;

Q=50; Eta=1./Dist; iter=1; Max_iters=100; for a=1:A

Tau{a}=ones(N,N);

RouteRecord{a}=zeros(M,N);

Length{a}=zeros(M,1);

Route_best{a}=zeros(Max_iters,N);

Len_best{a}=zeros(Max_iters,1); Len_ave{a}=zeros(Max_iters,1); end

D=zeros(Max_iters,1); Length_best=zeros(Max_iters,1); Length_ave=zeros(Max_iters,1); while iter<=Max_iters disp([,num2str(iter),]); Len=[];

for a=1:A b=(a-1<1)*A+(a-1>0)*(a-1); Start=ceil(N*rand(M,1)); RouteRecord{a}(:,1)=Start; citys_index=1:N; for i=1:M for j=2:N tabu=RouteRecord{a}(i,1:(j-1)); allow_index=~ismember(citys_index,tabu); allow=citys_index(allow_index); P=allow; for k=1:length(allow)

P(k)=Tau{a}(tabu(end),allow(k))^alpha*Eta(tabu(end),allow(k))^beta; end

P=P/sum(P); Pc=cumsum(P); target_index=find(Pc>=rand); target=allow(target_index(1)); RouteRecord{a}(i,j)=target; end end

Length{a}=zeros(M,1); for i=1:M

Route=RouteRecord{a}(i,:); for j=1:(N-1)

Length{a}(i)=Length{a}(i)+Dist(Route(j),Route(j+1)); end

Length{a}(i)=Length{a}(i)+Dist(Route(N),Route(1)); end

[min_Length,min_index]=min(Length{a}); Len_ave{a}(iter)=mean(Length{a}); if iter==1

Len_best{a}(iter)=min_Length;

Route_best{a}(iter,:)=RouteRecord{a}(min_index,:); else

Len_best{a}(iter)=min(Len_best{a}(iter-1),min_Length); if Len_best{a}(iter)==min_Length

Route_best{a}(iter,:)=RouteRecord{a}(min_index,:); else

Route_best{a}(iter,:)=Route_best{a}(iter-1,:); end end

Delta_Tau=zeros(N,N); for i=1:(W-1) for j=1:(N-1)

Delta_Tau(RouteRecord{a}(i,j),RouteRecord{a}(i,j+1))=... Delta_Tau(RouteRecord{a}(i,j),RouteRecord{a}(i,j+1))+(Wi)*Q/Length{a}(wa_id(i)); end

Delta_Tau(RouteRecord{a}(i,N),RouteRecord{a}(i,1))=

Delta_Tau(RouteRecord{a}(i,N),RouteRecord{a}(i,1))+(Wi)*Q/Length{a}(wa_id(i)); end

UTN_a_best_id=find(Len_best{a}(1:iter)==min(Len_best{a}(1:iter))); UTN_a_best_id=UTN_a_best_id(end); for j=1:(N-1)

Delta_Tau(Route_best{a}(UTN_a_best_id,j),Route_best{a}(UTN_a_best_id,j+1))=...

Delta_Tau(Route_best{a}(UTN_a_best_id,j),Route_best{a}(UTN_a_best_id,j+1))+... W*Q/Len_best{a}(UTN_a_best_id); end

Delta_Tau(Route_best{a}(UTN_a_best_id,j),Route_best{a}(UTN_a_best_id,j+1))=...

Delta_Tau(Route_best{a}(UTN_a_best_id,j),Route_best{a}(UTN_a_best_id,j+1))+... W*Q/Len_best{a}(UTN_a_best_id); if iter>100 for i=1:(n-1) for j=1:(N-1)

Delta_Tau(RouteRecord{b}(i,j),RouteRecord{b}(i,j+1))=...

Delta_Tau(RouteRecord{b}(i,j),RouteRecord{b}(i,j+1))+(ni)*Q/Length{b}(wb_id(i)); end

Delta_Tau(RouteRecord{b}(i,N),RouteRecord{b}(i,1))=... Delta_Tau(RouteRecord{b}(i,N),RouteRecord{b}(i,1))+(ni)*Q/Length{b}(wb_id(i)); end

UTN_b_best_id=find(Len_best{b}(1:iter-1)==min(Len_best{b}(1:iter-1))); UTN_b_best_id=UTN_b_best_id(end); for j=1:(N-1)

Delta_Tau(Route_best{b}(UTN_b_best_id,j),Route_best{b}(UTN_b_best_id,j+1))=...

Delta_Tau(Route_best{b}(UTN_b_best_id,j),Route_best{b}(UTN_b_best_id,j+1))+... n*Q/Len_best{b}(UTN_b_best_id); end

Delta_Tau(Route_best{b}(UTN_b_best_id,j),Route_best{b}(UTN_b_best_id,j+1))=...

Delta_Tau(Route_best{b}(UTN_b_best_id,j),Route_best{b}(UTN_b_best_id,j+1))+... n*Q/Len_best{b}(UTN_b_best_id); end

Tau{a}=(1-rho)*Tau{a}+Delta_Tau;

Len((end+1):(end+length(Length{a})))=Length{a}; [Shortest_Length(a),Shortest_id(a)]=min(Len_best{a}); end

Length_ave(iter)=mean(Len);

D(iter)=( sum( (Len-Length_ave(iter)).^2/(M*A-1) ) )^(1/2); Length_best(iter)=min(Len);

if iter>1 && Length_best(iter)>Length_best(iter-1) Length_best(iter)=Length_best(iter-1); end iter=iter+1;

end

index=find(Shortest_Length==min(Shortest_Length),1);

Shortest_Length=Shortest_Length(index);

Shortest_Route=Route_best{index}(Shortest_id(index),:); disp(['shortest path：',num2str(Shortest_Length)]); disp(['shortest path node：',num2str(Shortest_Route)]); figure(1) plot([Cities_XY(Shortest_Route,1);Cities_XY(Shortest_Route(1),1)],... [Cities_XY(Shortest_Route,2);Cities_XY(Shortest_Route(1),2)],'o-'); grid on; box on; for i=1:size(Cities_XY,1) end

hs=text(Cities_XY(Shortest_Route(1),1),Cities_XY(Shortest_Route(1),2),'Start'); set(hs,'color','r');

he=text(Cities_XY(Shortest_Route(end),1),Cities_XY(Shortest_Route(end),2),'End'); set(he,'color','r');

xlabel('\fontname{}\fontsize{12}x'); ylabel('\fontname{}\fontsize{12}y');

**2.City coordinates：**

| x | y |
| --- | --- |
| 130 | 212 |
| 339 | 115 |
| 417 | 244 |
| 312 | 139 |
| 348 | 535 |
| 326 | 556 |
| 338 | 129 |
| 196 | 222 |
| 431 | 790 |
| 486 | 570 |
| 307 | 190 |
| 562 | 156 |
| 288 | 191 |
| 381 | 676 |
| 133 | 695 |
| 375 | 178 |
| 318 | 279 |
| 401 | 270 |
| 370 | 212 |
| 376 | 278 |
| 429 | 288 |
| 423 | 291 |
| 329 | 908 |
| 307 | 267 |
| 394 | 243 |
| 349 | 301 |
| 295 | 340 |
| 140 | 350 |
| 245 | 257 |
| 778 | 226 |
| 230 | 275 |

**3.Single run, 100 iterations of results：**

| 3122.47596 |
| --- |
| 3097.466537 |
| 3063.617775 |
| 3063.617775 |
| 3058.930009 |
| 3058.930009 |
| 3058.930009 |
| 3058.930009 |
| 3058.930009 |
| 3058.930009 |
| 3058.930009 |
| 3058.930009 |
| 3058.930009 |
| 3058.930009 |
| 3058.930009 |
| 3058.930009 |
| 3058.930009 |
| 3058.930009 |
| 3058.930009 |
| 3058.930009 |
| 3058.930009 |
| 3058.930009 |
| 3058.930009 |
| 3058.930009 |
| 3058.930009 |
| 3058.930009 |
| 3058.930009 |
| 3058.930009 |
| 3058.930009 |
| 3058.930009 |
| 3058.930009 |
| 3058.930009 |
| 3058.930009 |
| 3058.930009 |

| 3058.930009 |
| --- |
| 3058.930009 |
| 3058.930009 |
| 3058.930009 |
| 3058.930009 |
| 3058.930009 |
| 3058.930009 |
| 3058.930009 |
| 3058.930009 |
| 3058.930009 |
| 3058.930009 |
| 3058.930009 |
| 3058.930009 |
| 3058.930009 |
| 3058.930009 |
| 3058.930009 |
| 3058.930009 |
| 3058.930009 |
| 3058.930009 |
| 3058.930009 |
| 3058.930009 |
| 3058.930009 |
| 3058.930009 |
| 3058.930009 |
| 3058.930009 |
| 3058.930009 |
| 3058.930009 |
| 3058.930009 |
| 3058.930009 |
| 3058.930009 |
| 3058.930009 |
| 3058.930009 |
| 3058.930009 |
| 3058.930009 |
| 3058.930009 |
| 3058.930009 |
| 3058.930009 |
| 3058.930009 |
| 3058.930009 |
| 3058.930009 |
| 3058.930009 |
| 3058.930009 |
| 3058.930009 |
| 3058.930009 |
| 3058.930009 |
| 3058.930009 |
| 3058.930009 |
| 3058.930009 |
| 3058.930009 |
| 3058.930009 |
| 3058.930009 |
| 3058.930009 |
| 3058.930009 |
| 3058.930009 |
| 3058.930009 |
| 3058.930009 |
| 3058.930009 |
| 3058.930009 |
| 3058.930009 |
| 3058.930009 |
| 3058.930009 |
| 3058.930009 |
| 3058.930009 |
| 3058.930009 |
| 3058.930009 |
| 3058.930009 |

**4.30 run results：**

| Shortest length | Iteration times |
| --- | --- |
| 3058.930009 | 5 |
| 3062.02589 | 4 |
| 3063.617775 | 9 |
| 3066.654949 | 4 |
| 3067.062627 | 3 |
| 3068.449324 | 9 |
| 3076.986996 | 4 |
| 3076.986996 | 16 |
| 3076.986996 | 4 |
| 3101.321766 | 5 |
| 3076.986996 | 8 |
| 3076.986996 | 3 |
| 3076.986996 | 6 |
| 3095.36103 | 3 |
| 3098.5349 | 4 |
| 3101.321766 | 3 |
| 3101.321766 | 3 |
| 3101.321766 | 3 |
| 3109.706351 | 3 |
| 3113.341533 | 13 |
| 3114.382524 | 3 |
| 3121.469225 | 3 |
| 3121.876375 | 4 |
| 3122.47596 | 3 |
| 3130.570225 | 4 |
| 3067.062627 | 3 |
| 3130.570225 | 3 |
| 3130.570225 | 3 |
| 3101.321766 | 9 |
| 3130.570225 | 4 |

**5.Map generation program：** MM=35;

G=zeros(MM,MM);

Zaa=[4

14

28

32

33

34

39

64

67

68

73

72

88

93

99

107

122

123

126

130

131

138

140

146

153

154

159

164

166

167

.

.

.

];% Barrier location in the map Za=Zaa'; for i=1:length(Za) row=ceil(Za(i)/MM); if row==0 row=1; end if mod(Za(i),MM)~=0 col=mod(Za(i),MM); else col=MM; end G(row,col)=1; end MM=size(G,1);

figure (1) for j=1:MM for i=1:MM if G(i,j)==1 x1=j-1;y1=MM-i; x2=j;y2=MM-i; x3=j;y3=MM-i+1; x4=j-1;y4=MM-i+1; fill([x1,x2,x3,x4],[y1,y2,y3,y4],[0,0,0]) hold on else x1=j-1;y1=MM-i; x2=j;y2=MM-i; x3=j;y3=MM-i+1; x4=j-1;y4=MM-i+1; fill([x1,x2,x3,x4],[y1,y2,y3,y4],[1,1,1]) hold on end end end

%%

location=zeros(MM*MM,2); for i=1:MM*MM if mod(i,MM)~=0 y=MM-(floor(i/MM)+1)+0.5; x=mod(i,MM)-0.5; else x=MM-0.5; y=MM-floor(i/MM)+0.5; end location(i,:)=[x,y]; text(x-0.5,y,num2str(i)); hold on; end

| **6.Map** | **barrier** | **No：** |  |
| --- | --- | --- | --- |
| 30*30（200） | | | 35*35(400) |
| 4 | | | 5 |
| 14 | | | 9 |
| 28 | | | 11 |
| 32 | | | 14 |
| 33 | | | 21 |
| 34 | | | 23 |
| 39 | | | 25 |
| 64 | | | 28 |
| 67 | | | 31 |
| 68 | | | 33 |
| 73 | | | 38 |
| 72 | | | 42 |
| 88 | | | 44 |
| 93 | | | 46 |
| 99 | | | 47 |
| 107 | | | 50 |
| 122 | | | 51 |
| 123 | | | 56 |
| 126 | | | 58 |
| 130 | | | 60 |
| 131 | | | 62 |
| 138 | | | 68 |
| 140 | | | 69 |
| 146 | | | 71 |
| 153 | | | 72 |
| 154 | | | 73 |
| 159 | | | 75 |
| 164 | | | 77 |
| 166 | | | 80 |
| 167 | | | 93 |
| 173 | | | 98 |

| 178 | 100 |
| --- | --- |
| 179 | 101 |
| 181 | 106 |
| 184 | 107 |
| 185 | 108 |
| 188 | 109 |
| 192 | 110 |
| 194 | 115 |
| 197 | 117 |
| 198 | 119 |
| 205 | 121 |
| 207 | 122 |
| 208 | 126 |
| 223 | 129 |
| 224 | 130 |
| 231 | 137 |
| 233 | 142 |
| 240 | 145 |
| 244 | 150 |
| 249 | 152 |
| 250 | 157 |
| 254 | 159 |
| 259 | 161 |
| 262 | 165 |
| 264 | 169 |
| 270 | 170 |
| 274 | 172 |
| 278 | 174 |
| 280 | 178 |
| 281 | 185 |
| 282 | 187 |
| 283 | 189 |
| 286 | 190 |
| 293 | 191 |
| 295 | 199 |
| 296 | 204 |
| 303 | 205 |
| 307 | 207 |
| 317 | 212 |
| 328 | 213 |
| 330 | 214 |
| 335 | 218 |
| 341 | 220 |

| 342 | 221 |
| --- | --- |
| 343 | 231 |
| 344 | 234 |
| 345 | 236 |
| 357 | 242 |
| 362 | 244 |
| 363 | 250 |
| 369 | 251 |
| 377 | 257 |
| 382 | 260 |
| 385 | 261 |
| 404 | 262 |
| 405 | 263 |
| 412 | 264 |
| 420 | 266 |
| 422 | 273 |
| 428 | 274 |
| 431 | 279 |
| 433 | 281 |
| 435 | 283 |
| 436 | 285 |
| 444 | 287 |
| 446 | 288 |
| 458 | 290 |
| 459 | 295 |
| 462 | 296 |
| 463 | 298 |
| 464 | 301 |
| 465 | 306 |
| 468 | 309 |
| 473 | 310 |
| 476 | 311 |
| 478 | 313 |
| 480 | 315 |
| 488 | 316 |
| 492 | 321 |
| 493 | 322 |
| 500 | 325 |
| 530 | 332 |
| 535 | 333 |
| 537 | 336 |
| 546 | 337 |
| 548 | 341 |

| 560 | 354 |
| --- | --- |
| 562 | 359 |
| 563 | 360 |
| 567 | 362 |
| 574 | 380 |
| 575 | 382 |
| 576 | 387 |
| 578 | 394 |
| 580 | 396 |
| 583 | 398 |
| 592 | 403 |
| 593 | 407 |
| 594 | 409 |
| 599 | 410 |
| 600 | 411 |
| 610 | 413 |
| 612 | 414 |
| 616 | 420 |
| 617 | 423 |
| 623 | 425 |
| 642 | 430 |
| 643 | 441 |
| 652 | 443 |
| 655 | 446 |
| 658 | 450 |
| 659 | 452 |
| 665 | 453 |
| 670 | 454 |
| 675 | 455 |
| 681 | 461 |
| 683 | 462 |
| 684 | 465 |
| 685 | 469 |
| 693 | 470 |
| 695 | 473 |
| 696 | 476 |
| 698 | 478 |
| 702 | 479 |
| 703 | 484 |
| 712 | 487 |
| 717 | 488 |
| 718 | 493 |
| 719 | 496 |

| 728 | 498 |
| --- | --- |
| 731 | 500 |
| 739 | 508 |
| 746 | 510 |
| 748 | 511 |
| 749 | 512 |
| 750 | 520 |
| 756 | 521 |
| 758 | 523 |
| 759 | 525 |
| 760 | 526 |
| 762 | 530 |
| 766 | 535 |
| 768 | 538 |
| 780 | 539 |
| 781 | 541 |
| 783 | 542 |
| 786 | 545 |
| 789 | 550 |
| 805 | 558 |
| 809 | 562 |
| 816 | 565 |
| 818 | 569 |
| 819 | 570 |
| 832 | 572 |
| 835 | 578 |
| 837 | 584 |
| 840 | 589 |
| 846 | 593 |
| 847 | 594 |
| 848 | 597 |
| 860 | 598 |
| 862 | 604 |
| 864 | 606 |
| 865 | 618 |
| 866 | 619 |
| 873 | 621 |
| 879 | 628 |
| 889 | 632 |
| 892 | 634 |
|  | 637 |
|  | 642 |
|  | 645 |

|  | 646 |
| --- | --- |
|  | 648 |
|  | 649 |
|  | 658 |
|  | 659 |
|  | 661 |
|  | 664 |
|  | 665 |
|  | 666 |
|  | 668 |
|  | 670 |
|  | 673 |
|  | 681 |
|  | 687 |
|  | 693 |
|  | 696 |
|  | 697 |
|  | 699 |
|  | 700 |
|  | 702 |
|  | 705 |
|  | 706 |
|  | 707 |
|  | 708 |
|  | 710 |
|  | 711 |
|  | 712 |
|  | 713 |
|  | 714 |
|  | 724 |
|  | 726 |
|  | 727 |
|  | 728 |
|  | 733 |
|  | 734 |
|  | 735 |
|  | 738 |
|  | 740 |
|  | 746 |
|  | 748 |
|  | 751 |
|  | 753 |
|  | 754 |

|  | 756 |
| --- | --- |
|  | 762 |
|  | 767 |
|  | 768 |
|  | 769 |
|  | 770 |
|  | 774 |
|  | 792 |
|  | 794 |
|  | 804 |
|  | 807 |
|  | 809 |
|  | 813 |
|  | 814 |
|  | 815 |
|  | 821 |
|  | 823 |
|  | 831 |
|  | 834 |
|  | 836 |
|  | 842 |
|  | 843 |
|  | 844 |
|  | 845 |
|  | 849 |
|  | 851 |
|  | 856 |
|  | 858 |
|  | 864 |
|  | 868 |
|  | 871 |
|  | 874 |
|  | 876 |
|  | 879 |
|  | 885 |
|  | 887 |
|  | 888 |
|  | 895 |
|  | 897 |
|  | 898 |
|  | 900 |
|  | 902 |
|  | 903 |

|  | 904 |
| --- | --- |
|  | 905 |
|  | 907 |
|  | 912 |
|  | 913 |
|  | 916 |
|  | 924 |
|  | 926 |
|  | 928 |
|  | 929 |
|  | 939 |
|  | 943 |
|  | 946 |
|  | 949 |
|  | 951 |
|  | 953 |
|  | 955 |
|  | 958 |
|  | 959 |
|  | 964 |
|  | 966 |
|  | 969 |
|  | 970 |
|  | 971 |
|  | 972 |
|  | 973 |
|  | 974 |
|  | 976 |
|  | 980 |
|  | 981 |
|  | 982 |
|  | 993 |
|  | 995 |
|  | 997 |
|  | 998 |
|  | 1001 |
|  | 1003 |
|  | 1005 |
|  | 1008 |
|  | 1009 |
|  | 1010 |
|  | 1013 |
|  | 1017 |

|  | 1018 |
| --- | --- |
|  | 1019 |
|  | 1029 |
|  | 1033 |
|  | 1037 |
|  | 1039 |
|  | 1041 |
|  | 1042 |
|  | 1044 |
|  | 1045 |
|  | 1047 |
|  | 1049 |
|  | 1061 |
|  | 1062 |
|  | 1063 |
|  | 1064 |
|  | 1067 |
|  | 1072 |
|  | 1075 |
|  | 1078 |
|  | 1084 |
|  | 1093 |
|  | 1094 |
|  | 1098 |
|  | 1099 |
|  | 1100 |
|  | 1108 |
|  | 1109 |
|  | 1111 |
|  | 1112 |
|  | 1115 |
|  | 1116 |
|  | 1119 |
|  | 1126 |
|  | 1128 |
|  | 1129 |
|  | 1136 |
|  | 1137 |
|  | 1139 |
|  | 1143 |
|  | 1145 |
|  | 1146 |
|  | 1152 |
|  | 1156 |
|  | 1164 |
|  | 1165 |
|  | 1168 |
|  | 1172 |
|  | 1173 |
|  | 1177 |
|  | 1178 |
|  | 1180 |
|  | 1181 |
|  | 1184 |
|  | 1186 |
|  | 1187 |
|  | 1190 |
|  | 1193 |
|  | 1198 |
|  | 1202 |
|  | 1205 |
|  | 1207 |
|  | 1208 |
|  | 1211 |
|  | 1217 |
|  | 1218 |
|  | 1219 |
|  | 1220 |

**7.30 run results：**

| 30*30 |  | 35*3 | 5 |
| --- | --- | --- | --- |
| Utility function value | Iteration times | Utility function value | Iteration times |
| 34.6902 | 8 | 46.147 | 10 |
| 34.9529 | 9 | 43.9411 | 10 |
| 35.8215 | 9 | 44.6098 | 11 |
| 35.5588 | 9 | 43.9411 | 10 |
| 34.4902 | 9 | 43.1411 | 12 |
| 34.2902 | 9 | 42.8784 | 10 |
| 35.1529 | 8 | 44.8784 | 10 |
| 35.6843 | 8 | 44.347 | 10 |
| 34.6902 | 9 | 44.8098 | 10 |
| 35.4215 | 10 | 43.9411 | 9 |
| 34.9588 | 8 | 43.1411 | 10 |
| 35.7588 | 8 | 45.1411 | 10 |
| 36.0215 | 8 | 43.347 | 10 |
| 34.2902 | 8 | 43.9411 | 10 |
| 35.4215 | 9 | 45.4039 | 10 |
| 36.2215 | 8 | 43.9411 | 10 |
| 34.9588 | 9 | 43.9411 | 10 |
| 37.8215 | 8 | 44.347 | 10 |
| 35.5588 | 9 | 43.9411 | 10 |
| 35.3588 | 9 | 45.1411 | 10 |
| 35.8215 | 9 | 45.1411 | 10 |
| 34.6902 | 9 | 41.8098 | 10 |
| 34.2902 | 8 | 41.8098 | 10 |
| 36.8274 | 9 | 45.6784 | 10 |
| 34.0902 | 8 | 43.1411 | 9 |
| 35.5588 | 8 | 43.1411 | 11 |
| 38.0843 | 8 | 41.8098 | 10 |
| 35.0843 | 9 | 44.347 | 10 |
| 36.7529 | 9 | 41.8843 | 10 |
| 35.6215 | 9 | 41.8098 | 10 |
